# Supplementary material for: Telomere Length, Apoptotic, and Inflammatory Genes: Novel Biomarkers of Gastrointestinal Tract Pathology and Meat Quality Traits in Chickens under Chronic Stress (Gallus gallus domesticus)
Source: MDPI journal article supplement (doi:10.3390/ani11113276), 2021-11-16
Supplement: s1 [file s1]

## Article

# Telomere Length, Apoptotic and Inflammatory genes: Novel Biomarkers of Gastrointestinal Tract Pathology and Meat Quality Traits in Chickens under Chronic Stress (*Gallus gallus domesticus*)

Kazeem Ajasa Badmus<sup>1,3</sup>, Zulkifli Idrus<sup>1,3</sup>, Goh Yong Meng<sup>2,3</sup> and Kamalludin Mamat-Hamidi<sup>1,3\*</sup>

<sup>1</sup> Department of Animal Science, Universiti Putra Malaysia, Selangor, Malaysia; alqasiminternational@yahoo.com; zulidrus@upm.edu.my; mamath@upm.edu.my

<sup>2</sup> Department of Veterinary Pre-Clinical Science, Universiti Putra Malaysia, Selangor, Malaysia; ymgoh@upm.edu.my

<sup>3</sup> Institute of Tropical Agriculture and Food Security, Universiti Putra Malaysia, Selangor, Malaysia; zulidrus@upm.edu.my; ymgoh@upm.edu.my; mamath@upm.edu.my

\* Correspondence: mamath@upm.edu.my

**Table S1a: Telomere length (kb/diploid genome) data of the Corticosterone fed chicken and the control at week 4**

| Trt  | TELO<br>Ct | GAPDH<br>Ct | TELO<br>copy no | GAPDH<br>copy no | TELO<br>length |
|------|------------|-------------|-----------------|------------------|----------------|
| CORT | 20.09      | 27.94       | 1770523         | 16724            | 105.8672       |
| 1    |            |             |                 |                  |                |
| 2    | 16.83      | 25.14       | 12273205        | 88216.16         | 139.1265       |
| 3    | 16.01      | 25.09       | 19973847        | 90875.06         | 219.7946       |
| 4    | 21.57      | 32          | 735128.4        | 1500.164         | 490.032        |
| 5    | 14.42      | 23.94       | 51353806        | 179914.3         | 285.4347       |
| 6    | 16.34      | 24.96       | 16418912        | 98169.32         | 167.2509       |
| 7    | 17.5       | 26.35       | 8244113         | 42998.29         | 191.7312       |
| 8    | 16.14      | 25.28       | 18489733        | 81177.89         | 227.7681       |
| 9    | 17         | 25          | 11094549        | 95864.66         | 115.7314       |
| 10   | 14.87      | 23.83       | 39310042        | 192060.6         | 204.6752       |
| CTRL | 14.74      | 24.39       | 42465339        | 137719.9         | 308.3457       |
| 1    |            |             |                 |                  |                |
| 2    | 18.41      | 25.35       | 4802047         | 77872.22         | 61.66573       |
| 3    | 16.14      | 26.84       | 18489733        | 32141.4          | 575.2623       |
| 4    | 15.29      | 24.95       | 30631787        | 98754.09         | 310.1825       |
| 5    | 14.23      | 23.63       | 57488318        | 216284.1         | 265.8001       |
| 6    | 14.98      | 24.34       | 36824008        | 141870.9         | 259.56         |
| 7    | 17.9       | 24.98       | 6500869         | 97010.15         | 67.01226       |
| 9    | 16.86      | 25.2        | 12056467        | 85127.96         | 141.6276       |
| 10   | 16.2       | 25.46       | 17842461        | 72947.45         | 244.5934       |

**Table S1b: Telomere length (kb/diploid genome) data of the Corticosterone fed chicken and the control at week 6**

| Trt  | TELO<br>Ct | GAPDH<br>Ct | TELO<br>COPY NO | GAPDH<br>COPY NO | TELO<br>LENGTH |
|------|------------|-------------|-----------------|------------------|----------------|
| CORT | 19.28      | 26.44       | 2864350         | 40760.3          | 70.27304       |
| 1    |            |             |                 |                  |                |
| 2    | 16.99      | 25.7        | 13577078        | 63256.7          | 214.6346       |
| 3    | 15.46      | 24.92       | 27690066        | 100529.4         | 275.4425       |
| 4    | 16.91      | 26.62       | 11703708        | 36627.7          | 319.5316       |
| 5    | 15.44      | 25.13       | 28020935        | 88741.64         | 315.7586       |
| 6    | 15.15      | 24.48       | 33287618        | 130551.8         | 254.9763       |
| 7    | 14.06      | 23.55       | 63595727        | 226808.4         | 280.3941       |
| 8    | 16.57      | 25.8        | 14322543        | 59609.22         | 240.274        |
| 9    | 19.08      | 27.49       | 3225614         | 21847.88         | 147.6396       |
| CTRL | 15.53      | 24.6        | 29912663        | 121571.3         | 246.0504       |
| 1    |            |             |                 |                  |                |
| 2    | 14.68      | 24.16       | 44005856        | 157877.7         | 278.7338       |
| 3    | 15.53      | 25.02       | 26562491        | 94732.7          | 280.3941       |
| 4    | 14.18      | 23.72       | 59221059        | 205026.8         | 288.8454       |
| 5    | 14.15      | 23.99       | 60285673        | 174650.3         | 345.1794       |
| 6    | 12.4       | 23.28       | 1.7E+08         | 266256.7         | 640.1674       |
| 7    | 17.79      | 25.39       | 6939750         | 76044.06         | 91.2596        |
| 8    | 14.98      | 26.52       | 36824008        | 38868.95         | 947.3888       |
| 9    | 14.36      | 25.4        | 53216771        | 75593.76         | 703.9836       |

**Table S2: Body weight, feed intake, weight gain FCR and their relative measurement**

| Weeks | Trt  | Body weight | Feed intake | wt gain | FCR      | RFI      | Rwt      | RFCR     |
|-------|------|-------------|-------------|---------|----------|----------|----------|----------|
| 4     | CORT | 967.19      | 827.78      | 228.67  | 3.619976 | 85.58608 | 23.64272 | 0.374278 |
| 4     | CORT | 1064.21     | 877.78      | 251.41  | 3.491428 | 82.48184 | 23.6241  | 0.328077 |
| 4     | CORT | 1120.88     | 877.78      | 298.41  | 2.941523 | 78.31168 | 26.62283 | 0.26243  |
| 4     | CORT | 1071.54     | 833.33      | 254.02  | 3.280568 | 77.76938 | 23.70607 | 0.306155 |
| 4     | CORT | 1047.22     | 800         | 265.22  | 3.016364 | 76.39274 | 25.3261  | 0.288035 |
| 4     | CTRL | 1479.48     | 944.44      | 465.37  | 2.029439 | 63.83594 | 31.45497 | 0.137172 |
| 4     | CTRL | 1574.87     | 1044.44     | 509.41  | 2.050293 | 66.31912 | 32.34616 | 0.130188 |
| 4     | CTRL | 1471.24     | 950         | 445.31  | 2.133345 | 64.57138 | 30.26767 | 0.145003 |
| 4     | CTRL | 1549.47     | 1027.78     | 482.07  | 2.132014 | 66.33107 | 31.11193 | 0.137596 |
| 4     | CTRL | 1471.72     | 983.3       | 579.96  | 1.695462 | 66.81298 | 39.40695 | 0.115203 |
| 6     | CORT | 1503.2      | 810         | 242.7   | 3.337454 | 53.88505 | 16.14556 | 0.222023 |
| 6     | CORT | 1517.74     | 810         | 267.54  | 3.027585 | 53.36882 | 17.62753 | 0.19948  |
| 6     | CORT | 1532.83     | 900         | 237.66  | 3.786922 | 58.71493 | 15.50465 | 0.247054 |
| 6     | CORT | 1409.18     | 783.33      | 200.47  | 3.907467 | 55.58765 | 14.226   | 0.277287 |
| 6     | CORT | 1432.97     | 808.33      | 203.97  | 3.962985 | 56.40942 | 14.23407 | 0.276557 |
| 6     | CTRL | 2229.51     | 992.86      | 433.77  | 2.288909 | 44.53266 | 19.45584 | 0.102664 |
| 6     | CTRL | 2452.13     | 1058.33     | 481.99  | 2.195751 | 43.15962 | 19.65597 | 0.089545 |
| 6     | CTRL | 2319.98     | 1025        | 452.69  | 2.264243 | 44.18142 | 19.51267 | 0.097598 |
| 6     | CTRL | 2472.91     | 1142.86     | 475.91  | 2.40142  | 46.21519 | 19.24494 | 0.097109 |
| 6     | CTRL | 2343.22     | 1064.29     | 481.22  | 2.21165  | 45.41998 | 20.5367  | 0.094385 |

**Table S3: Meat Shear Force of the Corticosterone fed chicken and the control at week 4 and 6**

| Trt/Week | Shear Force (Kg) | Trt/Week | Shear Force (Kg) | Trt   | Shear Force (Kg) |
|----------|------------------|----------|------------------|-------|------------------|
| CORT4    | 1.18806          | CORT6    | 1.51801          | Ctrl4 | 1.78888          |
| CORT4    | 1.45614          | CORT6    | 2.18586          | Ctrl4 | 1.9475           |
| CORT4    | 2.7803           | CORT6    | 1.47674          | Ctrl4 | 1.66457          |
| CORT4    | 1.855            | CORT6    | 1.36011          | Ctrl4 | 1.3726           |
| CORT4    | 1.80505          | CORT6    | 1.14021          | Ctrl4 | 2.17835          |
| CORT4    | 1.69962          | CORT6    | 2.0069           | Ctrl4 | 1.13             |
| CORT4    | 1.25594          | CORT6    | 1.8117           | Ctrl4 | 0.92985          |
| CORT4    | 1.14192          | CORT6    | 2.35022          | Ctrl4 | 0.9056           |
| CORT4    | 1.91355          | CORT6    | 1.3005           | Ctrl4 | 0.99973          |
| CORT4    | 1.15215          | CORT6    | 2.32426          | Ctrl4 | 0.938            |
| CORT4    | 1.66886          | CORT6    | 2.10703          | Ctrl4 | 0.94158          |
| CORT4    | 1.79425          | CORT6    | 1.93666          |       |                  |
| CORT4    | 1.174            | CORT6    | 1.03657          |       |                  |
| CORT4    | 0.94465          | CORT6    | 2.52811          |       |                  |
| CORT4    | 0.92176          | CORT6    | 1.17261          |       |                  |
| CORT4    | 0.9757           | CORT6    | 1.75949          |       |                  |
| CTRL4    | 1.45514          | Ctrl6    | 1.29842          |       |                  |
| CTRL4    | 1.76442          | Ctrl6    | 1.19779          |       |                  |
| CTRL4    | 1.56329          | Ctrl6    | 1.63739          |       |                  |
| CTRL4    | 1.4              | Ctrl6    | 1.50084          |       |                  |
| CTRL4    | 1.21438          | Ctrl6    | 1.33812          |       |                  |
| CTRL4    | 1.0189           | Ctrl6    | 1.34821          |       |                  |
| CTRL4    | 1.56493          | Ctrl6    | 1.27833          |       |                  |
| CTRL4    | 1.75748          | Ctrl6    | 1.24886          |       |                  |
| CTRL4    | 1.6999           | Ctrl6    | 1.124            |       |                  |

**Table S4a: Small intestinal villi height of CORT fed chicken and control**

| Weeks | Duod<br>Ht (μm) | Weeks | Jeju Ht<br>(μm) | Weeks | Ileum<br>Ht (μm) |
|-------|-----------------|-------|-----------------|-------|------------------|
| CORT4 | 794.12          | CORT4 | 299.75          | CORT4 | 574.7            |
| CORT4 | 671             | CORT4 | 360.01          | CORT4 | 561.05           |
| CORT4 | 559.82          | CORT4 | 540.53          | CORT4 | 244.56           |
| CORT4 | 414.07          | CORT4 | 434.7           | CORT4 | 348.78           |
| CORT4 | 751             | CORT4 | 430.76          | CORT4 | 366.87           |
| CORT4 | 643.45          | CORT4 | 248.78          | CORT4 | 601.6            |
| CORT4 | 742.73          | CORT4 | 423.33          | CORT4 | 290              |
| CORT4 | 489.05          | CORT4 | 287.7           | CORT4 | 283              |
| CTRL4 | 470.64          | CORT4 | 373.01          | CORT4 | 336.28           |
| CTRL4 | 442.05          | CORT4 | 520.11          | CORT4 | 292.93           |
| CTRL4 | 484.17          | CORT4 | 266.51          | CORT4 | 248.78           |
| CTRL4 | 412.42          | CORT4 | 624.88          | CORT4 | 209.37           |
| CTRL4 | 645             | CORT4 | 358.84          | CORT4 | 229.82           |
| CTRL4 | 293.13          | CORT4 | 477.61          | CORT4 | 220.57           |
| CTRL4 | 487.36          | CORT4 | 438.98          | CORT4 | 248.78           |
| CTRL4 | 626.98          | CORT4 | 520.11          | CORT4 | 222.9            |
| CTRL4 | 710.76          | CORT4 | 497.61          | CORT4 | 239.93           |
| CTRL4 | 426.22          | CORT4 | 624.88          | CORT4 | 257.89           |
| CTRL4 | 599.62          | CORT4 | 266.51          | CORT4 | 201.05           |
| CTRL4 | 706.77          | CORT4 | 648.2           | CORT4 | 300.3            |
| CTRL4 | 546.78          | CORT4 | 600.73          | CORT4 | 340.95           |
| CTRL4 | 611.64          | CORT4 | 581.2           | CORT4 | 352.12           |
| CTRL4 | 497.31          | CORT4 | 409.34          | CORT4 | 371.05           |
| CTRL4 | 411.09          | CORT4 | 619.24          | Ctrl4 | 276.21           |
| CTRL4 | 377.08          | CORT4 | 358             | Ctrl4 | 388.19           |
| CTRL4 | 408.68          | CORT4 | 559.78          | Ctrl4 | 303.61           |

**Table S4b: Small intestinal villi height of CORT fed chicken and control**

| Weeks | Duod<br>Ht (μm) | Weeks | Jeju Ht<br>(μm) | Weeks | Ileum<br>Ht (μm) |
|-------|-----------------|-------|-----------------|-------|------------------|
| CORT6 | 567.85          | CTRL4 | 357.03          | CTRL4 | 393.2            |
|       |                 | CORT4 | 331.68          | CTRL4 | 347.45           |
| CORT6 | 446             | CORT4 | 540.59          | CTRL4 | 366.93           |
| CORT6 | 529.99          | CORT4 | 307.46          | CTRL4 | 325.73           |
| CORT6 | 313.16          | CORT4 | 307.85          | CTRL4 | 292.58           |
| CORT6 | 599.63          | CTRL4 | 311.14          | CTRL4 | 187.26           |
| CORT6 | 255.95          | CTRL4 | 329.69          | CTRL4 | 325.25           |
| CORT6 | 397.87          | CTRL4 | 365.72          | CTRL4 | 252.42           |
| CORT6 | 216.45          | CTRL4 | 409.68          | CTRL4 | 238.57           |
| CORT6 | 355.31          | CTRL4 | 311.46          | CTRL4 | 390.1            |
| CORT6 | 300.46          | CTRL4 | 399.33          | CTRL4 | 356.23           |
| CORT6 | 247.72          | CTRL4 | 437.13          | CTRL4 | 445.911          |
| CORT6 | 809.1           | CTRL4 | 380.94          | CTRL4 | 434.43           |
| CORT6 | 582.82          | CTRL4 | 321.74          | CTRL4 | 360.98           |
| CORT6 | 565.68          | CTRL4 | 453.01          | CTRL4 | 204.83           |
| CORT6 | 549.6           | CTRL4 | 447.78          | CTRL4 | 306.74           |
| CORT6 | 590.87          | CTRL4 | 249.8           | CTRL4 | 143.25           |
| CORT6 | 621.68          | CTRL4 | 514.91          | CTRL4 | 199.43           |
| CORT6 | 606.65          | CTRL4 | 493.31          | CTRL4 | 197.99           |
| CORT6 | 556.6           | CTRL4 | 579.48          | CTRL4 | 192.07           |
| CORT6 | 600.32          | CTRL4 | 387.79          | CTRL4 | 304.9            |
| CORT6 | 587.67          | CTRL4 | 443.66          | CTRL4 | 282.07           |
| CORT6 | 591.97          | CORT6 | 656.85          | CTRL4 | 296.05           |
| CORT6 | 573             | CORT6 | 642.44          | CTRL4 | 260.11           |
| CORT6 | 605.61          | CORT6 | 601             | CTRL4 | 315.34           |
| CORT6 | 351.12          | CORT6 | 405.45          | CORT6 | 280.5            |
| CORT6 | 431.79          | CORT6 | 676.15          | CORT6 | 264.97           |

**Table S4c: Small intestinal villi height of CORT fed chicken and control**

| Weeks | Duod<br>Ht (µm) | Weeks | Jeju Ht<br>(µm) | Weeks | Ileum<br>Ht (µm) |
|-------|-----------------|-------|-----------------|-------|------------------|
| CORT6 | 249.67          | CORT6 | 728.94          | CORT6 | 283.17           |
| CORT6 | 788.2           | CORT6 | 661.96          | CORT6 | 393.31           |
| CTRL6 | 418             | CORT6 | 683.46          | CORT6 | 334.21           |
| CTRL6 | 802.61          | CORT6 | 739.69          | CORT6 | 318.76           |
| CTRL6 | 365.25          | CORT6 | 737.63          | CORT6 | 201.42           |
| CTRL6 | 489.47          | CORT6 | 682.17          | CORT6 | 196.77           |
| CTRL6 | 422.96          | CORT6 | 509.08          | CORT6 | 231.5            |
| CTRL6 | 387.81          | CORT6 | 719.19          | CORT6 | 518.14           |
| CTRL6 | 527.52          | CTRL6 | 683.17          | CORT6 | 629.61           |
| CTRL6 | 553.75          | CTRL6 | 652.04          | CORT6 | 341.5            |
| CTRL6 | 303.07          | CTRL6 | 663.73          | CORT6 | 411.39           |
| CTRL6 | 314.34          | CTRL6 | 619.08          | CTRL6 | 465.14           |
| CTRL6 | 498.38          | CTRL6 | 570.15          | CTRL6 | 504.15           |
| CTRL6 | 352.94          | CTRL6 | 612.38          | CTRL6 | 489.28           |
| CTRL6 | 415.48          | CTRL6 | 555.03          | CTRL6 | 423.49           |
| CTRL6 | 360.66          | CTRL6 | 513.56          | CTRL6 | 394.15           |
| CTRL6 | 419.36          | CTRL6 | 346.78          | CTRL6 | 391.23           |
| CTRL6 | 452.59          | CTRL6 | 607.79          | CTRL6 | 440.16           |
| CTRL6 | 636.6           | CTRL6 | 538.27          | CTRL6 | 387.64           |
| CTRL6 | 541.72          |       |                 | CTRL6 | 366.19           |
| CTRL6 | 465.14          |       |                 | CTRL6 | 528.87           |
| CTRL6 | 504.15          |       |                 | CTRL6 | 199.98           |
|       |                 |       |                 | CTRL6 | 377.24           |
|       |                 |       |                 | CTRL6 | 313.67           |
|       |                 |       |                 | CTRL6 | 315.22           |
|       |                 |       |                 | CTRL6 | 324.34           |
|       |                 |       |                 | CTRL6 | 496.7            |
|       |                 |       |                 | CTRL6 | 485              |
|       |                 |       |                 | CTRL6 | 412.03           |
|       |                 |       |                 | CTRL6 | 264.15           |
|       |                 |       |                 | CTRL6 | 395.1            |
|       |                 |       |                 | CTRL6 | 439.98           |
|       |                 |       |                 | CTRL6 | 496.7            |

**Table S5a: Small intestinal crypt depth of CORT fed chicken and control**

| Weeks | Duod<br>Cd<br>( $\mu\text{m}$ ) | Weeks | Jeju Cd<br>( $\mu\text{m}$ ) | Weeks | Ileum<br>Cd<br>( $\mu\text{m}$ ) |
|-------|---------------------------------|-------|------------------------------|-------|----------------------------------|
| CORT4 | 67.36                           | CORT4 | 53.64                        | CORT4 | 71.23                            |
| CORT4 | 64.27                           | CORT4 | 58.67                        | CORT4 | 98.82                            |
| CORT4 | 67.36                           | CORT4 | 52.25                        | CORT4 | 72.07                            |
| CORT4 | 60.31                           | CORT4 | 74.24                        | CORT4 | 80.8                             |
| CORT4 | 115.16                          | CORT4 | 59.3                         | CORT4 | 54.22                            |
| CORT4 | 108.97                          | CORT4 | 57.57                        | CORT4 | 87.91                            |
| CORT4 | 82.93                           | CORT4 | 65.31                        | CORT4 | 37.57                            |
| CORT4 | 78.37                           | CORT4 | 41.08                        | CORT4 | 30.98                            |
| CORT4 | 79.65                           | CORT4 | 72.28                        | CORT4 | 45.36                            |
| CORT4 | 77.35                           | CORT4 | 77.31                        | CORT4 | 34.36                            |
| CTRL4 | 58.24                           | CORT4 | 75.56                        | CORT4 | 36.15                            |
| CTRL4 | 53.87                           | CORT4 | 32.07                        | CORT4 | 45.02                            |
| CTRL4 | 83.79                           | CORT4 | 52.69                        | CORT4 | 75.2                             |
| CTRL4 | 45.08                           | CTRL4 | 64.15                        | CORT4 | 87.1                             |
| CTRL4 | 69.27                           | CTRL4 | 55.61                        | CTRL4 | 43.03                            |
| CTRL4 | 99.12                           | CTRL4 | 62.12                        | CTRL4 | 71.76                            |
| CTRL4 | 86.15                           | CTRL4 | 49.95                        | CTRL4 | 49.45                            |
| CTRL4 | 66.17                           | CTRL4 | 81.03                        | CTRL4 | 39.22                            |
| CTRL4 | 51.53                           | CTRL4 | 74.56                        | CTRL4 | 86.6                             |
| CTRL4 | 55.06                           | CTRL4 | 57.24                        | CTRL4 | 49.48                            |
| CORT6 | 64.74                           | CTRL4 | 64.97                        | CTRL4 | 52.75                            |
| CORT6 | 73.14                           | CTRL4 | 73.96                        | CTRL4 | 53.6                             |



**Table S5b: Small intestinal crypt depth of CORT fed chicken and control**

| Weeks | Duod<br>Cd<br>( $\mu\text{m}$ ) | Weeks | jej Cd<br>( $\mu\text{m}$ ) | Weeks | Ileum<br>Cd<br>( $\mu\text{m}$ ) |
|-------|---------------------------------|-------|-----------------------------|-------|----------------------------------|
| CORT6 | 60.16                           | CTRL4 | 55.26                       | CTRL4 | 44.59                            |
| CORT6 | 54.7                            | CTRL4 | 67.1                        | CTRL4 | 47.16                            |
| CORT6 | 42.56                           | CTRL4 | 55.7                        | CTRL4 | 32.33                            |
| CORT6 | 54.98                           | CTRL4 | 110.93                      | CTRL4 | 48.99                            |
| CORT6 | 60.57                           | CTRL4 | 85.24                       | CTRL4 | 45.69                            |
| CORT6 | 38.15                           | CTRL4 | 71                          | CTRL4 | 44.63                            |
| CORT6 | 38.05                           | CORT6 | 55.11                       | CTRL4 | 53.1                             |
| CORT6 | 50.2                            | CORT6 | 62.12                       | CORT6 | 49.75                            |
| CORT6 | 46.04                           | CORT6 | 75.74                       | CORT6 | 53.1                             |
| CORT6 | 45.71                           | CORT6 | 55.11                       | CORT6 | 49                               |
| CORT6 | 75.86                           | CORT6 | 78.47                       | CORT6 | 46.37                            |
| CORT6 | 61.27                           | CORT6 | 40.77                       | CORT6 | 31.62                            |
| CTRL6 | 57.81                           | CORT6 | 79.65                       | CORT6 | 32.03                            |
| CTRL6 | 63.41                           | CORT6 | 76.55                       | CORT6 | 57.82                            |
| CTRL6 | 47.85                           | CORT6 | 73.14                       | CORT6 | 48.46                            |
| CTRL6 | 59.41                           | CORT6 | 108.66                      | CORT6 | 39.12                            |
| CTRL6 | 49.39                           | CORT6 | 79.65                       | CORT6 | 41.09                            |
| CTRL6 | 58.24                           | CORT6 | 41.44                       | CORT6 | 33.77                            |
| CTRL6 | 49.39                           | CORT6 | 35.79                       | CORT6 | 42.63                            |
| CTRL6 | 52.75                           | CTRL6 | 65                          | CORT6 | 58.25                            |
| CTRL6 | 58.24                           | CTRL6 | 57.34                       | CORT6 | 43.81                            |
| CTRL6 | 47.85                           | CTRL6 | 58.34                       | CORT6 | 44.38                            |
| CTRL6 | 59.4                            | CTRL6 | 52.72                       | CORT6 | 64.18                            |
| CTRL6 | 86.7                            | CTRL6 | 54.13                       | CORT6 | 60.74                            |
| CTRL6 | 93.36                           | CTRL6 | 48.79                       | CORT6 | 76.19                            |
| CTRL6 | 104.69                          | CTRL6 | 74.6                        | CTRL6 | 55.06                            |
| CTRL6 | 91.02                           | CTRL6 | 54.13                       | CTRL6 | 68.13                            |
| CTRL6 | 110.9                           | CTRL6 | 61.31                       | CTRL6 | 53.77                            |
| CTRL6 | 115.06                          | CTRL6 | 50.31                       | CTRL6 | 58.12                            |
| CTRL6 | 39.78                           |       |                             | CTRL6 | 46.12                            |
| CTRL6 | 50.41                           |       |                             | CTRL6 | 63.68                            |
| CTRL6 | 48.99                           |       |                             | CTRL6 | 53.68                            |
|       |                                 |       |                             | CTRL6 | 59.15                            |
|       |                                 |       |                             | CTRL6 | 63.92                            |
|       |                                 |       |                             | CTRL6 | 41.09                            |
|       |                                 |       |                             | CTRL6 | 46.46                            |
|       |                                 |       |                             | CTRL6 | 74.03                            |

**Table S6: Muscle Fibres of CORT fed chicken and control**

| <b>Weeks</b> | <b>Myofbril<br/>(<math>\mu\text{m}</math>)</b> | <b>Weeks</b> | <b>Myofibril<br/>bundles<br/>(<math>\mu\text{m}</math>)</b> |
|--------------|------------------------------------------------|--------------|-------------------------------------------------------------|
| CORT4        | 53.15                                          | CORT4        | 301.75                                                      |
| CORT4        | 49.24                                          | CORT4        | 452.65                                                      |
| CORT4        | 52.04                                          | CORT4        | 472.45                                                      |
| CORT4        | 57.13                                          | CORT4        | 145.05                                                      |
| CTRL4        | 77.41                                          | CORT4        | 283.55                                                      |
| CTRL4        | 67.09                                          | CORT4        | 633.79                                                      |
| CTRL4        | 67.43                                          | CORT4        | 374.75                                                      |
| CTRL4        | 71.85                                          | CORT4        | 649.11                                                      |
| CTRL4        | 98.81                                          | CORT4        | 424.83                                                      |
| CTRL4        | 64.21                                          | CORT4        | 417.51                                                      |
| CTRL4        | 71.34                                          | CORT4        | 403.19                                                      |
| CTRL4        | 76.15                                          | CORT4        | 486                                                         |
| CORT6        | 74                                             | CORT4        | 513.17                                                      |
| CORT6        | 80                                             | CTRL4        | 409.86                                                      |
| CORT6        | 79.12                                          | CTRL4        | 272.85                                                      |
| CORT6        | 74.97                                          | CTRL4        | 237.72                                                      |
| CORT6        | 90                                             | CTRL4        | 578.66                                                      |
| CTRL6        | 96.98                                          | CTRL4        | 802.67                                                      |
| CTRL6        | 95.72                                          | CTRL4        | 386.45                                                      |
| CTRL6        | 97.53                                          | CTRL4        | 488.31                                                      |
| CTRL6        | 120.3                                          | CTRL4        | 1086.06                                                     |
| CTRL6        | 102.81                                         | CTRL4        | 856.38                                                      |
| CTRL6        | 107.51                                         | CTRL4        | 563.35                                                      |
| CTRL6        | 77.58                                          | CORT6        | 230.21                                                      |
| CTRL6        | 115.11                                         | CORT6        | 466.92                                                      |
| CTRL6        | 77                                             | CORT6        | 353.64                                                      |
|              |                                                | CORT6        | 388.02                                                      |
|              |                                                | CORT6        | 551.09                                                      |
|              |                                                | CORT6        | 665.61                                                      |
|              |                                                | CTRL6        | 1014                                                        |
|              |                                                | CTRL6        | 687.68                                                      |
|              |                                                | CTRL6        | 543.65                                                      |
|              |                                                | CTRL6        | 768.35                                                      |
|              |                                                | CTRL6        | 856                                                         |

**Table S7: Chemical (Proximate composition) of the meat quality traits of CORT fed chicken and control**

| Weeks | CP (%) | Weeks | ME (Mj/Kg) | Weeks | EE (%)   | Weeks | Moisture (%) | Dm (%)   |
|-------|--------|-------|------------|-------|----------|-------|--------------|----------|
| CORT2 | 18.47  | CORT2 | 20.778     | CORT2 | 5.666667 | CTRL2 | 75.24603     | 24.75397 |
| CORT2 | 16.43  | CORT2 | 20.795     | CORT2 | 6.333333 | CTRL2 | 75.42857     | 24.57143 |
| CORT2 | 18.83  | CORT2 | 20.686     | CORT2 | 6        | CTRL2 | 73.3305      | 26.6695  |
| CORT2 | 18.36  | CORT2 | 20.815     | CORT2 | 10.73333 | CTRL2 | 71.40381     | 28.59619 |
| CORT2 | 18.12  | CORT2 | 21.285     | CORT2 | 5.333333 | CTRL2 | 73.29361     | 26.70639 |
| CTRL2 | 18.17  | CORT2 | 19.9       | CTRL2 | 4        | CTRL2 | 75.48677     | 24.51323 |
| CTRL2 | 19.16  | CORT2 | 21.58      | CTRL2 | 5        | CTRL2 | 75.52036     | 24.47964 |
| CTRL2 | 26.18  | CORT2 | 21.354     | CTRL2 | 7.333333 | CTRL2 | 74.86279     | 25.13721 |
| CTRL2 | 15.54  | CTRL2 | 20.781     | CTRL2 | 3.333333 | CORT2 | 72.49825     | 27.50175 |
| CTRL2 | 18.08  | CTRL2 | 20.586     | CTRL2 | 6.8      | CORT2 | 73.22835     | 26.77165 |
| CTRL2 | 19.11  | CTRL2 | 20.948     | CORT4 | 9.333333 | CORT2 | 74.36811     | 25.63189 |
| CORT4 | 19.55  | CTRL2 | 20.436     | CORT4 | 8.666667 | CORT2 | 72.60083     | 27.39917 |
| CORT4 | 18.94  | CTRL2 | 21.251     | CORT4 | 9.666667 | CORT2 | 74.05797     | 25.94203 |
| CORT4 | 18.79  | CTRL2 | 20.161     | CORT4 | 8        | CORT2 | 72.00957     | 27.99043 |
| CORT4 | 18.89  | CTRL2 | 21.062     | CORT4 | 9        | CORT2 | 74.19528     | 25.80472 |
| CORT4 | 18.034 | CTRL2 | 20.163     | CORT4 | 5.666667 | CORT2 | 69.51477     | 30.48523 |
| CORT4 | 17.81  | CORT4 | 21.598     | CORT4 | 8.566667 | CORT2 | 73.57992     | 26.42008 |
| CORT4 | 17.92  | CORT4 | 21.877     | CTRL4 | 8.333333 | CTRL4 | 73.71879     | 26.28121 |
| CORT4 | 18.071 | CORT4 | 21.37      | CTRL4 | 13.66667 | CTRL4 | 74.18908     | 25.81092 |
| CTRL4 | 19.3   | CORT4 | 21.776     | CTRL4 | 11       | CTRL4 | 75.2057      | 24.7943  |
| CTRL4 | 19.26  | CORT4 | 21.617     | CTRL4 | 9        | CTRL4 | 74.51327     | 25.48673 |
| CTRL4 | 18.89  | CORT4 | 20.438     | CTRL4 | 5        | CTRL4 | 73.46466     | 26.53534 |
| CTRL4 | 19.3   | CORT4 | 20.294     | CTRL4 | 7.733333 | CTRL4 | 74.44332     | 25.55668 |
| CTRL4 | 17.32  | CORT4 | 20.842     | CTRL4 | 4.966667 | CTRL4 | 73.96785     | 26.03215 |
| CTRL4 | 18.316 | CORT4 | 20.571     | CTRL4 | 5.466667 | CTRL4 | 73.87535     | 26.12465 |
| CTRL4 | 19.12  | CTRL4 | 21.347     | CTRL4 | 11.93333 | CTRL4 | 73.87736     | 26.12264 |
| CTRL4 | 17.54  | CTRL4 | 22.123     |       |          | CORT4 | 71.91235     | 28.08765 |
| CTRL4 | 20.189 | CTRL4 | 21.835     |       |          | CORT4 | 72.68856     | 27.31144 |
|       |        | CTRL4 | 21.57      |       |          | CORT4 | 72.2973      | 27.7027  |
|       |        | CTRL4 | 21.65      |       |          | CORT4 | 74.49306     | 25.50694 |
|       |        | CTRL4 | 20.811     |       |          | CORT4 | 72.32472     | 27.67528 |
|       |        | CTRL4 | 20.294     |       |          | CORT4 | 72.34679     | 27.65321 |
|       |        | CTRL4 | 20.5       |       |          | CORT4 | 71.13772     | 28.86228 |
|       |        | CTRL4 | 21.741     |       |          | CORT4 | 74.31966     | 25.68034 |
|       |        | CTRL4 | 22.805     |       |          | CORT4 | 73.3996      | 26.6004  |
|       |        |       |            |       |          | CORT4 | 73.45528     | 26.54472 |

**Table S8a: Meat Colours of CORT fed chicken and control**

| <b>Trt</b> | <b>L*</b> | <b>a*</b> | <b>b*</b> |
|------------|-----------|-----------|-----------|
| CORT2      | 52.9      | 6.73      | 21.56     |
| CORT2      | 53.13     | 6.29      | 22.65     |
| CORT2      | 54.96     | 5.2       | 21.95     |
| CORT2      | 59.13     | 5.82      | 25.88     |
| CORT2      | 58.36     | 5.89      | 25.83     |
| CORT2      | 58.28     | 5.71      | 26.01     |
| CORT2      | 54.09     | 10.11     | 23.17     |
| CORT2      | 54.33     | 8.78      | 23.36     |
| CORT2      | 53.69     | 10.79     | 23.39     |
| CORT2      | 51.02     | 9.68      | 21.44     |
| CORT2      | 52.61     | 8.96      | 21.39     |
| CORT2      | 53.3      | 7.78      | 21.3      |
| CORT2      | 56.68     | 7.51      | 25.75     |
| CORT2      | 57.9      | 7.72      | 26.48     |
| CORT2      | 56.6      | 7.07      | 23.43     |
| CORT2      | 54.33     | 7.87      | 23.16     |
| CORT2      | 54.45     | 7.68      | 23.29     |
| CORT2      | 54.23     | 7.9       | 23.48     |
| CORT2      | 53.54     | 7.9       | 22.57     |
| CORT2      | 53.68     | 7.09      | 21.88     |
| CORT2      | 54.57     | 6.82      | 22.26     |
| CORT2      | 54.25     | 6.61      | 22.5      |
| CORT2      | 53.17     | 7.27      | 24.55     |
| CORT2      | 53.42     | 6.93      | 24.33     |
| CORT2      | 52.6      | 7.49      | 24.06     |
| CORT2      | 54.65     | 8.57      | 26.11     |
| CORT2      | 54.19     | 8.62      | 26.51     |
| CORT2      | 53.85     | 8.79      | 26.25     |
| CORT2      | 50.48     | 7.34      | 24.55     |
| CORT2      | 50.59     | 7.45      | 24.44     |
| CORT2      | 50.46     | 7.15      | 24.77     |

**Table S8b: Meat Colours of CORT fed chicken and control**

| Trt   | L*    | a*   | b*    |
|-------|-------|------|-------|
| CTRL2 | 56.42 | 6.73 | 21.28 |
| CTRL2 | 57.09 | 6.22 | 21.71 |
| CTRL2 | 56.69 | 6.38 | 22.23 |
| CTRL2 | 52.69 | 8.92 | 21.97 |
| CTRL2 | 52.61 | 9.46 | 22.69 |
| CTRL2 | 53.48 | 8.94 | 23.24 |
| CTRL2 | 51.87 | 7.16 | 21.84 |
| CTRL2 | 51.58 | 6.9  | 21.05 |
| CTRL2 | 51.51 | 7.02 | 21.15 |
| CTRL2 | 57.39 | 6.52 | 20.75 |
| CTRL2 | 55.89 | 6.58 | 20.92 |
| CTRL2 | 57.4  | 6.14 | 20.56 |
| CTRL2 | 49.36 | 9.09 | 21.48 |
| CTRL2 | 49.96 | 8.85 | 22.08 |
| CTRL2 | 49.6  | 8.69 | 21.37 |
| CTRL2 | 52.1  | 6.34 | 21.11 |
| CTRL2 | 49.43 | 7.95 | 21.56 |
| CTRL2 | 51.59 | 6.68 | 20.89 |
| CTRL2 | 58.34 | 6.54 | 23.91 |
| CTRL2 | 58.51 | 6.14 | 23.44 |
| CTRL2 | 58.3  | 6.38 | 24.27 |
| CTRL2 | 52.75 | 8.31 | 22.08 |
| CTRL2 | 54.18 | 7.55 | 22.34 |
| CTRL2 | 53.34 | 7.89 | 22.47 |

**Table S8c: Meat Colours of CORT fed chicken and control**

| <b>Trt</b> | <b>L*</b> | <b>a*</b> | <b>b*</b> |
|------------|-----------|-----------|-----------|
| CORT4      | 55.75     | 4.82      | 24.86     |
| CORT4      | 55.03     | 4.61      | 23.78     |
| CORT4      | 55.94     | 4.83      | 25.76     |
| CORT4      | 52.88     | 6.63      | 19.7      |
| CORT4      | 52.81     | 6.51      | 19.76     |
| CORT4      | 52.78     | 6.62      | 19.99     |
| CORT4      | 41.03     | 11.46     | 19.94     |
| CORT4      | 40.81     | 11.21     | 19.09     |
| CORT4      | 40.99     | 11.21     | 19.69     |
| CORT4      | 51.01     | 6.74      | 18.86     |
| CORT4      | 51.44     | 6.49      | 18.91     |
| CORT4      | 50.86     | 6.75      | 18.91     |
| CORT4      | 46.58     | 6.76      | 18.66     |
| CORT4      | 46.64     | 6.71      | 18.97     |
| CORT4      | 46.45     | 6.94      | 18.52     |
| CORT4      | 49.72     | 7.29      | 18.8      |
| CORT4      | 49.22     | 8.43      | 18.96     |
| CORT4      | 49.47     | 7.91      | 19.26     |
| CORT4      | 50.47     | 7.38      | 26.05     |
| CORT4      | 51.77     | 7.36      | 24.96     |
| CORT4      | 51.46     | 7.11      | 25.89     |
| CORT4      | 51.2      | 3.37      | 15.97     |
| CORT4      | 52.34     | 2.71      | 15.91     |
| CORT4      | 51.39     | 3.14      | 16.18     |
| CORT4      | 50.17     | 7.64      | 22.32     |
| CORT4      | 49.91     | 7.4       | 21.86     |
| CORT4      | 49.75     | 7.81      | 22.74     |
| CORT4      | 52.86     | 7.43      | 22.51     |
| CORT4      | 52.82     | 7.34      | 22.35     |
| CORT4      | 53.04     | 7.82      | 22.85     |

**Table S8d: Meat Colours of CORT fed chicken and control**

| <b>Trt</b> | <b>L*</b> | <b>a*</b> | <b>b*</b> |
|------------|-----------|-----------|-----------|
| CTRL4      | 50.08     | 6.52      | 16.17     |
| CTRL4      | 49.62     | 6.46      | 16.18     |
| CTRL4      | 49.52     | 6.5       | 16.42     |
| CTRL4      | 59.3      | 3.74      | 18.67     |
| CTRL4      | 59.01     | 3.61      | 18.44     |
| CTRL4      | 59.18     | 3.36      | 18.26     |
| CTRL4      | 53.27     | 8.14      | 22.16     |
| CTRL4      | 51.91     | 9.13      | 22.79     |
| CTRL4      | 53.69     | 7.69      | 22.06     |
| CTRL4      | 59.71     | 4.38      | 20.87     |
| CTRL4      | 58.99     | 4.73      | 20.73     |
| CTRL4      | 59.66     | 4.46      | 20.65     |
| CTRL4      | 59.19     | 2.71      | 17.51     |
| CTRL4      | 58.94     | 2.11      | 16.13     |
| CTRL4      | 49.45     | 4.45      | 19.22     |
| CTRL4      | 50.6      | 4.43      | 19.49     |
| CTRL4      | 51.7      | 4.07      | 19.68     |
| CTRL4      | 53.17     | 4.83      | 20.31     |
| CTRL4      | 53.31     | 5.01      | 20.12     |
| CTRL4      | 53.27     | 4.67      | 19.85     |
| CTRL4      | 56.51     | 5.11      | 23.44     |
| CTRL4      | 57.79     | 5         | 23.52     |
| CTRL4      | 57.5      | 5.36      | 22.93     |
| CTRL4      | 54.22     | 4.75      | 19.35     |
| CTRL4      | 54.05     | 4.8       | 19.42     |
| CTRL4      | 54.12     | 4.68      | 19.64     |
| CTRL4      | 59.35     | 3.01      | 19.49     |
| CTRL4      | 60.28     | 2.92      | 19.61     |
| CTRL4      | 58.83     | 3.27      | 19.58     |
| CTRL4      | 54.89     | 7.61      | 25        |
| CTRL4      | 54.51     | 8.04      | 26.34     |
| CTRL4      | 54.96     | 7.73      | 25.58     |
| CTRL4      | 54.42     | 7.67      | 25.51     |
| CTRL4      | 51.9      | 7.03      | 23.31     |
| CTRL4      | 51.4      | 7.37      | 24.32     |
| CTRL4      | 51.97     | 6.74      | 23.62     |

**Table S9: pH, Drip loss and cooking loss of of CORT fed chicken and control**

| Trt   | pH   | Trt   | DL (%)   | Trt   | CL (%)   |
|-------|------|-------|----------|-------|----------|
| CORT2 | 5.54 | CORT2 | 2.937788 | CORT2 | 24.16174 |
| CORT2 | 5.27 | CORT2 | 4.433498 | CORT2 | 26.23815 |
| CORT2 | 5.55 | CORT2 | 4.226543 | CORT2 | 22.22222 |
| CORT2 | 5.41 | CORT2 | 1.777778 | CORT2 | 31.36027 |
| CORT2 | 5.5  | CORT2 | 2.839117 | CORT2 | 18.29871 |
| CORT2 | 5.47 | CORT2 | 2.702703 | CORT2 | 23.91304 |
| CORT2 | 5.41 | CORT2 | 3.324808 | CORT2 | 23.94247 |
| CORT2 | 5.47 | CORT2 | 3.162055 | CORT2 | 26.33567 |
| CORT2 | 5.58 | CORT2 | 2.614897 | CORT2 | 28.30937 |
| CORT  | 5.43 | CTRL2 | 2.351157 | CORT2 | 22.73442 |
| CTRL2 | 5.62 | CTRL2 | 2.036324 | CTRL2 | 32.72942 |
| CTRL2 | 5.65 | CTRL2 | 1.188061 | CTRL2 | 49.91658 |
| CTRL2 | 5.83 | CTRL2 | 1.851229 | CTRL2 | 33.43492 |
| CTRL2 | 5.69 | CTRL2 | 1.896463 | CTRL2 | 28.92243 |
| CTRL2 | 5.64 | CTRL2 | 2.261307 | CTRL2 | 16.22003 |
| CTRL2 | 5.64 | CTRL2 | 2.581095 | CTRL2 | 24.06554 |
| CTRL2 | 5.9  | CTRL2 | 1.417482 | CTRL2 | 31.96203 |
| CTRL2 | 5.66 | CORT4 | 4.311927 | CTRL2 | 29.16796 |
| CTRL2 | 5.63 | CORT4 | 8.693772 | CTRL2 | 41.16248 |
| CTRL2 | 5.45 | CORT4 | 4.774436 | CTRL2 | 20.67019 |
| CORT4 | 6.42 | CORT4 | 6.219081 | CORT4 | 26.00281 |
| CORT4 | 6.23 | CORT4 | 4.620231 | CORT4 | 26.31579 |
| CORT4 | 6.34 | CORT4 | 4.224626 | CORT4 | 27.6176  |
| CORT4 | 6.06 | CORT4 | 5.127082 | CORT4 | 25.30928 |
| CORT4 | 6.41 | CORT4 | 6.132542 | CORT4 | 48.50338 |
| CORT4 | 5.93 | CORT4 | 4.149835 | CORT4 | 27.96185 |
| CORT4 | 6    | CORT4 | 3.317811 | CORT4 | 19.25134 |
| CORT4 | 6.37 | CTRL4 | 3.675937 | CORT4 | 29.7434  |
| CORT4 | 5.92 | CTRL4 | 3.65     | CORT4 | 18.3278  |
| CORT4 | 5.63 | CTRL4 | 2.868104 | CORT4 | 28.01095 |
| CTRL4 | 5.63 | CTRL4 | 3.570555 | CTRL4 | 26.39849 |
| CTRL4 | 5.67 | CTRL4 | 4.677966 | CTRL4 | 46.63262 |
| CTRL4 | 5.49 | CTRL4 | 2.61661  | CTRL4 | 31.59443 |
| CTRL4 | 5.92 | CTRL4 | 3.649794 | CTRL4 | 29.00552 |
| CTRL4 | 5.72 | CTRL4 | 3.268156 | CTRL4 | 29.6671  |
| CTRL4 | 6.01 | CTRL4 | 3.60151  | CTRL4 | 20.53649 |
| CTRL4 | 5.63 | CTRL4 | 4.157489 | CTRL4 | 26.70988 |
| CTRL4 | 6.02 |       |          | CTRL4 | 46.07247 |
| CTRL4 | 6.01 |       |          | CTRL4 | 32.29116 |
| CTRL4 | 6.02 |       |          | CTRL4 | 22.48791 |



**Table S10a: Gene expression of *COX6A1* of Muscle at week 4 of CORT fed chicken and control**

| Trt  | <i>GAPDH</i> | <i>B-actin</i> | Ref. av  | <i>COX6A1</i> |                      |
|------|--------------|----------------|----------|---------------|----------------------|
|      | Av.Ct        | Av.Ct          |          | Av.Ct         | 2- $\Delta\Delta$ Ct |
|      | RG           | RG             |          | Test          |                      |
| CTRL | 32.69        | 29.3           | 30.94862 | 31.6          | 1                    |
| CTRL | 34.63        | 36.06          | 35.33777 | 37.72         | 1                    |
| CTRL | 26.56        | 30.22          | 28.33096 | 36.21         | 1                    |
| CTRL | 29.64        | 36.68          | 32.97264 | 32.62         | 1                    |
| CTRL | 31.18        | 30.99          | 31.08485 | 33.29         | 1                    |
| CTRL | 25.75        | 30.22          | 27.89561 | 23.24         | 1                    |
| CTRL | 37.3         | 34.15          | 35.69026 | 36.97         | 1                    |
| CORT | 26.94        | 32.26          | 29.48024 | 31.46         | 0.642264             |
| CORT | 29.5         | 29             | 29.24893 | 32.42         | 0.281251             |
| CORT | 29.72        | 28.1           | 28.89865 | 33.35         | 0.115795             |
| CORT | 29.82        | 32             | 30.89078 | 30.38         | 3.609441             |
| CORT | 32.48        | 28.1           | 30.21073 | 33.24         | 0.310298             |
| CORT | 31.3         | 31.24          | 31.26999 | 34            | 0.381826             |
| CORT | 29.82        | 33.05          | 31.39349 | 31.15         | 2.999011             |

**Table S10b: Gene expression of *UCP3* of Muscle at week 4 of CORT fed chicken and control**

| Trt  | <i>GAPDH</i> | <i>B-actin</i> | Ref. av  | <i>UCP3</i> |                      |
|------|--------------|----------------|----------|-------------|----------------------|
|      | Av.Ct        | Av.Ct          |          | Av.Ct       | 2- $\Delta\Delta$ Ct |
|      | RG           | RG             |          | Test        |                      |
| CTRL | 34.63        | 30.22          | 32.34994 | 30.03       | 1                    |
| CTRL | 26.56        | 36.68          | 31.21251 | 21.42       | 1                    |
| CTRL | 29.64        | 30.99          | 30.30748 | 22.21       | 1                    |
| CTRL | 31.18        | 30.22          | 30.69625 | 21.37       | 1                    |
| CTRL | 25.75        | 34.15          | 29.65405 | 24.75       | 1                    |
| CORT | 29.5         | 29             | 29.24893 | 22.26       | 1.07098              |
| CORT | 29.72        | 28.1           | 28.89865 | 22.08       | 0.951747             |
| CORT | 29.82        | 32             | 30.89078 | 24.7        | 0.615903             |
| CORT | 25.03        | 29.73          | 27.27896 | 21.77       | 0.383943             |
| CORT | 32.48        | 28.1           | 30.21073 | 25.08       | 0.295397             |
| CORT | 31.3         | 31.24          | 31.26999 | 27          | 0.162666             |

**Table S10c: Gene expression of COX6A1 of Muscle at week 6 of CORT fed chicken and control**

| Trt  | <i>GAPDH</i> | <i>B-actin</i> | Ref. av     | <i>COX6A1</i> |          |
|------|--------------|----------------|-------------|---------------|----------|
|      | Av.Ct        | Av.Ct          |             | Av.Ct         | 2-ΔΔCt   |
|      | RG           | RG             |             | Test          |          |
| CTRL | 26.06        | 27.63          | 26.83352008 | 30.06         | 1        |
| CTRL | 35.68        | 36.41          | 36.04315192 | 35.11         | 1        |
| CTRL | 29.34        | 28.36          | 28.84583852 | 30.64         | 1        |
| CTRL | 26.29        | 27.93          | 27.09759583 | 31.04         | 1        |
| CTRL | 28.94        | 30.51          | 29.71463276 | 31.73         | 1        |
| CTRL | 26.57        | 28.75          | 27.63851479 | 31.35         | 1        |
| CTRL | 28.93        | 27.93          | 28.4256029  | 27.75         | 1        |
| CORT | 28.72        | 30.69          | 29.6886645  | 32.06         | 0.706453 |
| CORT | 28.6         | 30.28          | 29.42801386 | 35.05         | 0.074223 |
| CORT | 26.7         | 28.64          | 27.6529926  | 30.89         | 0.387695 |
| CORT | 24.31        | 27.72          | 25.95906778 | 31.47         | 0.080162 |
| CORT | 24.78        | 30.18          | 27.3470364  | 34.06         | 0.034844 |
| CORT | 25.62        | 28.27          | 26.91240235 | 31.35         | 0.168685 |
| CORT | 25.84        | 28.62          | 27.19449944 | 30.8          | 0.300305 |
| CORT | 26.55        | 28.37          | 27.44491756 | 29.83         | 0.699753 |

**Table S10d: Gene expression (fold change) of *UCP3* of Muscle at week 6 of CORT fed chicken and control**

| Trt  | <i>GAPDH</i> | <i>B-actin</i> | Ref.av      | <i>UCP3</i> |                      |
|------|--------------|----------------|-------------|-------------|----------------------|
|      | Av.Ct        | Av.Ct          |             | Av.Ct       | 2- $\Delta\Delta$ Ct |
|      | RG           | RG             |             | Test        |                      |
| CTRL | 26.06        | 27.63          | 26.83352008 | 23.1        | 1                    |
| CTRL | 35.68        | 36.41          | 36.04315192 | 36.01       | 1                    |
| CTRL | 26.29        | 28.36          | 27.30539141 | 22.03       | 1                    |
| CTRL | 28.94        | 27.93          | 28.4305153  | 23.84       | 1                    |
| CTRL | 22.16        | 30.51          | 26.00195377 | 23.14       | 1                    |
| CTRL | 26.57        | 28.75          | 27.63851479 | 23.03       | 1                    |
| CTRL | 28.93        | 27.93          | 28.4256029  | 23.28       | 1                    |
| CORT | 28.72        | 30.69          | 29.6886645  | 26.03       | 0.938653             |
| CORT | 34.92        | 36.5           | 35.70126048 | 32.91       | 0.514506             |
| CORT | 33           | 36.22          | 34.57253245 | 34.33       | 0.087932             |
| CORT | 28.6         | 30.28          | 29.42801386 | 24.46       | 2.326262             |
| CORT | 26.7         | 28.64          | 27.6529926  | 21.38       | 5.747731             |
| CORT | 24.31        | 27.72          | 25.95906778 | 21.21       | 1.998708             |
| CORT | 24.78        | 30.18          | 27.3470364  | 21.24       | 5.123169             |
| CORT | 25.62        | 28.27          | 26.91240235 | 21.12       | 4.119309             |
| CORT | 25.84        | 28.62          | 27.19449944 | 23.3        | 1.105347             |
| CORT | 26.55        | 28.37          | 27.44491756 | 22.98       | 1.641389             |

**Table S10e: Gene expression (fold change) of COX6A1 of Liver at week 4 of CORT fed chicken and control**

| Trt  | <i>GAPDH</i> | <i>B-actin</i> | Ref.av   | <i>COX6A1</i> |                      |
|------|--------------|----------------|----------|---------------|----------------------|
|      | Av.Ct        | Av.Ct          |          | Av.Ct         | 2- $\Delta\Delta$ Ct |
|      | RG           | RG             |          | Test          |                      |
| CTRL | 27.09        | 28.25          | 27.66392 | 26.56         | 1                    |
| CTRL | 23.66        | 23.32          | 23.48938 | 25.4          | 1                    |
| CTRL | 24.2         | 23.85          | 24.02436 | 26.58         | 1                    |
| CTRL | 25.29        | 24.98          | 25.13452 | 28.71         | 1                    |
| CTRL | 25.57        | 25.38          | 25.47482 | 25.41         | 1                    |
| CTRL | 23.96        | 23.88          | 23.91997 | 27.67         | 1                    |
| CTRL | 28.45        | 29.76          | 29.09763 | 31.99         | 1                    |
| CTRL | 26.48        | 26.27          | 26.37479 | 30.54         | 1                    |
| CTRL | 27.68        | 28.25          | 27.96355 | 27.38         | 1                    |
| CTRL | 26.9         | 26.88          | 26.89    | 27.65         | 1                    |
| CORT | 28.57        | 30.02          | 29.28603 | 29.16         | 3.747757             |
| CORT | 24.86        | 25.34          | 25.09885 | 26.21         | 1.589808             |
| CORT | 29.46        | 29.59          | 29.52493 | 29.47         | 3.567537             |
| CORT | 25.25        | 24.8           | 25.02399 | 25.33         | 2.777888             |
| CORT | 28.67        | 28.21          | 28.43907 | 27.51         | 6.539                |
| CORT | 26.88        | 27.78          | 27.3263  | 27.79         | 2.490258             |
| CORT | 27.07        | 26.85          | 26.95978 | 27.39         | 2.548725             |
| CORT | 26.12        | 25.4           | 25.75748 | 24.84         | 6.486698             |
| CORT | 26.97        | 29.98          | 28.4352  | 27.5          | 6.566843             |
| CORT | 29.52        | 29.77          | 29.64474 | 28.85         | 5.957621             |

**Table S10f: Gene expression (fold change) of UCP3 of Liver at week 4 of CORT fed chicken and control**

| Trt  | <i>GAPDH</i> | <i>B-actin</i> | Ref.av   | <i>UCP3</i> | 2- $\Delta\Delta$ Ct |
|------|--------------|----------------|----------|-------------|----------------------|
|      | Av.Ct        | Av.Ct          |          | Av.Ct       |                      |
|      | RG           | RG             |          | Test        |                      |
| CTRL | 27.09        | 28.25          | 27.66392 | 26.75       | 1                    |
| CTRL | 23.66        | 23.32          | 23.48938 | 27.73       | 1                    |
| CTRL | 24.2         | 23.85          | 24.02436 | 23.89       | 1                    |
| CTRL | 25.29        | 24.98          | 25.13452 | 24.82       | 1                    |
| CTRL | 25.57        | 25.38          | 25.47482 | 25.28       | 1                    |
| CTRL | 23.96        | 23.88          | 23.91997 | 24.22       | 1                    |
| CTRL | 28.45        | 29.76          | 29.09763 | 27.35       | 1                    |
| CTRL | 26.48        | 26.27          | 26.37479 | 38.53       | 1                    |
| CTRL | 27.68        | 28.25          | 27.96355 | 27.39       | 1                    |
| CTRL | 26.9         | 26.88          | 26.89    | 27.44       | 1                    |
| CORT | 28.57        | 30.02          | 29.28603 | 29.64       | 1.980723             |
| CORT | 24.86        | 25.34          | 25.09885 | 24.44       | 3.99682              |
| CORT | 29.46        | 29.59          | 29.52493 | 28.83       | 4.098024             |
| CORT | 25.25        | 24.8           | 25.02399 | 24.86       | 2.836257             |
| CORT | 28.67        | 28.21          | 28.43907 | 27.77       | 4.025226             |
| CORT | 26.88        | 27.78          | 27.3263  | 27.77       | 1.86128              |
| CORT | 27.07        | 26.85          | 26.95978 | 27.7        | 1.515481             |
| CORT | 26.12        | 25.4           | 25.75748 | 25.48       | 3.068395             |
| CORT | 26.97        | 29.98          | 28.4352  | 27.66       | 4.332501             |
| CORT | 29.52        | 29.77          | 29.64474 | 28.34       | 6.253815             |

**Table S10g: Gene expression (fold change) of COX6A1 of Liver at week 6 of CORT fed chicken and control**

| Trt  | <i>GAPDH</i> | <i>B-actin</i> | Ref.     | <i>COX6A1</i> | 2- $\Delta\Delta$ Ct |
|------|--------------|----------------|----------|---------------|----------------------|
|      | Av.Ct        | Av.Ct          |          | Av.Ct         |                      |
|      | RG           | RG             |          | Test          |                      |
| CTRL | 27.17        | 28.22          | 27.69002 | 31.33         | 1                    |
| CTRL | 24.72        | 24.89          | 24.80485 | 24.65         | 1                    |
| CTRL | 26.92        | 26.92          | 26.92    | 27.98         | 1                    |
| CTRL | 25.88        | 26.92          | 26.39488 | 29.95         | 1                    |
| CTRL | 25.19        | 25.55          | 25.36936 | 23.63         | 1                    |
| CTRL | 26.05        | 27.08          | 26.56001 | 27.52         | 1                    |
| CTRL | 27.53        | 27.69          | 27.60988 | 29.48         | 1                    |
| CTRL | 24.86        | 29.29          | 26.98424 | 27.18         | 1                    |
| CTRL | 26.27        | 33.25          | 29.55465 | 26.73         | 1                    |
| CTRL | 27.69        | 24.42          | 26.00365 | 25.33         | 1                    |
| CORT | 27.68        | 28.54          | 28.10671 | 30.53         | 0.280624             |
| CORT | 27.33        | 28.17          | 27.74682 | 28.78         | 0.735512             |
| CORT | 27.37        | 27.7           | 27.53451 | 27.09         | 2.048412             |
| CORT | 26.34        | 27.57          | 26.94798 | 27.23         | 1.237976             |
| CORT | 26.83        | 26.62          | 26.72479 | 26.95         | 1.287698             |
| CORT | 26.77        | 26.62          | 26.69489 | 27.18         | 1.075416             |
| CORT | 26.46        | 27.27          | 26.86195 | 27.68         | 0.853786             |
| CORT | 26.62        | 26.72          | 26.66995 | 27.63         | 0.773757             |

**Table S10h: Gene expression (fold change) of *UCP3* of Liver at week 6 of CORT fed chicken and control**

| Trt  | <i>GAPDH</i> | <i>B-actin</i> | Ref.av   | <i>UCP3</i> | 2- $\Delta\Delta$ Ct |
|------|--------------|----------------|----------|-------------|----------------------|
|      | Av.Ct        | Av.Ct          |          | Av.Ct       |                      |
|      | RG           | RG             |          | Test        |                      |
| CTRL | 27.17        | 28.22          | 27.69002 | 28.34       | 1                    |
| CTRL | 24.72        | 24.89          | 24.80485 | 23.9        | 1                    |
| CTRL | 26.92        | 26.92          | 26.92    | 25.99       | 1                    |
| CTRL | 25.88        | 26.92          | 26.39488 | 27.07       | 1                    |
| CTRL | 25.19        | 25.55          | 25.36936 | 25.12       | 1                    |
| CTRL | 26.05        | 27.08          | 26.56001 | 27.42       | 1                    |
| CTRL | 27.53        | 27.69          | 27.60988 | 26.59       | 1                    |
| CTRL | 24.86        | 29.29          | 26.98424 | 26.09       | 1                    |
| CTRL | 26.27        | 33.25          | 29.55465 | 27.66       | 1                    |
| CTRL | 27.69        | 24.42          | 26.00365 | 27.98       | 1                    |
| CORT | 27.68        | 28.54          | 28.10671 | 27.5        | 1.353515             |
| CORT | 27.33        | 28.17          | 27.74682 | 27.54       | 1.025851             |
| CORT | 27.37        | 27.7           | 27.53451 | 27.21       | 1.11304              |
| CORT | 26.34        | 27.57          | 26.94798 | 27.27       | 0.71103              |
| CORT | 26.83        | 26.62          | 26.72479 | 25.86       | 1.618653             |
| CORT | 26.77        | 26.62          | 26.69489 | 26.39       | 1.098013             |
| CORT | 26.67        | 27.27          | 26.96833 | 27.32       | 0.696566             |
| CORT | 27.15        | 26.72          | 26.93414 | 26.9        | 0.910128             |
| CORT | 26.46        | 26.88          | 26.66917 | 27.4        | 0.53558              |
| CORT | 26.62        | 27.86          | 27.23294 | 26.21       | 1.806182             |

**Table S10i: Gene expression (fold change) of *SAAL1* of Liver at week 4 of CORT fed chicken and control**

| Trt  | <i>GAPDG</i> | <i>B-actin</i> | Ref.av   | <i>SAAL1</i> | 2- $\Delta\Delta C_t$ |
|------|--------------|----------------|----------|--------------|-----------------------|
|      | Av.Ct        | Av.Ct          |          | Av.Ct        |                       |
|      | RG           | RG             |          | Test         |                       |
| CTRL | 27.09        | 28.25          | 27.66392 | 26.76        | 1                     |
| CTRL | 23.66        | 23.32          | 23.48938 | 23.8         | 1                     |
| CTRL | 24.2         | 23.85          | 24.02436 | 23.88        | 1                     |
| CTRL | 25.29        | 24.98          | 25.13452 | 25.08        | 1                     |
| CTRL | 25.57        | 25.38          | 25.47482 | 25.08        | 1                     |
| CTRL | 23.96        | 23.88          | 23.91997 | 23.75        | 1                     |
| CTRL | 28.45        | 29.76          | 29.09763 | 22.54        | 1                     |
| CTRL | 26.48        | 26.27          | 26.37479 | 29.43        | 1                     |
| CTRL | 27.68        | 28.25          | 27.96355 | 27.85        | 1                     |
| CTRL | 26.9         | 26.88          | 26.89    | 26.5         | 1                     |
| CORT | 28.57        | 30.02          | 29.28603 | 28.67        | 1.054111              |
| CORT | 24.86        | 25.34          | 25.09885 | 24.39        | 1.124164              |
| CORT | 25.25        | 24.8           | 25.02399 | 25.68        | 0.43648               |
| CORT | 28.67        | 28.21          | 28.43907 | 26.92        | 1.971194              |
| CORT | 26.88        | 27.78          | 27.3263  | 27.18        | 0.761172              |
| CORT | 27.07        | 26.85          | 26.95978 | 27.22        | 0.57426               |
| CORT | 26.12        | 25.4           | 25.75748 | 25.39        | 0.887294              |
| CORT | 26.97        | 29.98          | 28.4352  | 26.57        | 2.505676              |
| CORT | 29.52        | 29.77          | 29.64474 | 27.59        | 2.857466              |



**Table S10j: Gene expression (fold change) of SAAL1 of Liver at week 6 of CORT fed chicken and control**

| Trt  | <i>GAPDH</i> | <i>B-actin</i> | Ref.av.  | <i>SAAL1</i> | 2- $\Delta\Delta$ Ct |
|------|--------------|----------------|----------|--------------|----------------------|
|      | Av.Ct        | Av.Ct          |          | Av.Ct        |                      |
|      | RG           | RG             |          | Test         |                      |
| CTRL | 27.17        | 28.22          | 27.69002 | 27.26        | 1                    |
| CTRL | 24.72        | 24.89          | 24.80485 | 25.19        | 1                    |
| CTRL | 26.92        | 26.92          | 26.92    | 26.8         | 1                    |
| CTRL | 25.88        | 26.92          | 26.39488 | 27.54        | 1                    |
| CTRL | 25.19        | 25.55          | 25.36936 | 26           | 1                    |
| CTRL | 26.05        | 27.08          | 26.56001 | 28.04        | 1                    |
| CTRL | 24.86        | 27.69          | 26.23687 | 28.88        | 1                    |
| CTRL | 26.27        | 29.29          | 27.73893 | 26.57        | 1                    |
| CTRL | 27.69        | 33.25          | 30.34292 | 28.99        | 1                    |
| CORT | 27.68        | 28.54          | 28.10671 | 27.32        | 2.214086             |
| CORT | 27.33        | 28.17          | 27.74682 | 27.74        | 1.289509             |
| CORT | 27.37        | 27.7           | 27.53451 | 27.1         | 1.734483             |
| CORT | 26.34        | 27.57          | 26.94798 | 26.6         | 1.633519             |
| CORT | 26.83        | 26.62          | 26.72479 | 26.42        | 1.585342             |
| CORT | 26.77        | 26.62          | 26.69489 | 27.45        | 0.760434             |
| CORT | 26.67        | 27.27          | 26.96833 | 25.4         | 3.806147             |
| CORT | 27.15        | 26.72          | 26.93414 | 27.08        | 1.160014             |
| CORT | 26.62        | 26.88          | 26.74968 | 28.18        | 0.476215             |

**Table S10k: Gene expression (fold change) of CRP of Liver at week 4 of CORT fed chicken and control**

| Trt  | <i>GAPDG</i> | <i>B-actin</i> | Ref.av   | Av.Ct<br>Test | 2- $\Delta\Delta$ Ct |
|------|--------------|----------------|----------|---------------|----------------------|
|      | Av.Ct        | Av.Ct          |          |               |                      |
|      | RG           | RG             |          |               |                      |
| 1    | 27.09        | 28.25          | 27.66392 | 25.77         |                      |
| CTRL | 23.66        | 23.32          | 23.48938 | 22.15         | 1                    |
| CTRL | 24.2         | 23.85          | 24.02436 | 21.73         | 1                    |
| CTRL | 25.29        | 24.98          | 25.13452 | 22.97         | 1                    |
| CTRL | 25.57        | 25.38          | 25.47482 | 23.22         | 1                    |
| CTRL | 23.96        | 23.88          | 23.91997 | 21.74         | 1                    |
| CTRL | 28.45        | 29.76          | 29.09763 | 28.95         | 1                    |
| CTRL | 26.48        | 26.27          | 26.37479 | 25.58         | 1                    |
| CTRL | 27.68        | 28.25          | 27.96355 | 25.91         | 1                    |
| CTRL | 26.9         | 26.88          | 26.89    | 25.36         | 1                    |
| CORT | 28.57        | 30.02          | 29.28603 | 27.63         | 0.990362             |
| CORT | 24.86        | 25.34          | 25.09885 | 25.28         | 0.277172             |
| CORT | 29.46        | 29.59          | 29.52493 | 26.39         | 2.760498             |
| CORT | 25.25        | 24.8           | 25.02399 | 23.64         | 0.820166             |
| CORT | 26.88        | 27.78          | 27.3263  | 25.14         | 1.430277             |
| CORT | 27.07        | 26.85          | 26.95978 | 24.99         | 1.230953             |
| CORT | 26.12        | 25.4           | 25.75748 | 24.96         | 0.546194             |
| CORT | 29.52        | 29.98          | 29.74911 | 27.45         | 1.546612             |

**Table S10l: Gene expression (fold change) of CRP of Liver at week 6 of CORT fed chicken and control**

| Trt  | <i>GAPDH</i> | <i>B-actin</i> | Ref.av   | Av.Ct<br>Test | 2-ΔΔCt   |
|------|--------------|----------------|----------|---------------|----------|
|      | Av.Ct        | Av.Ct          |          |               |          |
|      | RG           | RG             |          |               |          |
| CTRL | 27.17        | 28.22          | 27.69002 | 28.45         | 1        |
| CTRL | 24.72        | 24.89          | 24.80485 | 26.3          | 1        |
| CTRL | 26.92        | 26.92          | 26.92    | 26.85         | 1        |
| CTRL | 25.88        | 26.92          | 26.39488 | 26.36         | 1        |
| CTRL | 25.19        | 25.55          | 25.36936 | 24.77         | 1        |
| CTRL | 26.05        | 27.08          | 26.56001 | 27.87         | 1        |
| CTRL | 27.53        | 27.69          | 27.60988 | 27.54         | 1        |
| CTRL | 26.27        | 29.29          | 27.73893 | 29.38         | 1        |
| CTRL | 27.69        | 33.25          | 30.34292 | 31.2          | 1        |
| CORT | 27.33        | 28.54          | 27.92845 | 28.6          | 0.94504  |
| CORT | 27.37        | 28.17          | 27.76712 | 26.87         | 2.803286 |
| CORT | 26.77        | 27.57          | 27.16706 | 26.02         | 3.333541 |
| CORT | 26.67        | 26.62          | 26.64499 | 30.58         | 0.098413 |
| CORT | 26.46        | 26.62          | 26.53988 | 31.01         | 0.067915 |
| CORT | 26.62        | 27.27          | 26.94304 | 29.6          | 0.238662 |

**Table S10m: Gene expression (fold change) of COX6A1 of Heart at week 6 for the CORT fed chicken and control**

| Trt  | <i>GAPDH</i> | <i>B-actin</i> | Ref.av.  | <i>COX6A1</i> | 2-ΔΔCt   |
|------|--------------|----------------|----------|---------------|----------|
|      | Av.Ct        | Av.Ct          |          | Av.Ct         |          |
|      | RG           | RG             |          | Test          |          |
| CTRL | 26.13        | 28.19          | 27.14046 | 27.11         | 1        |
| CTRL | 26.61        | 28.91          | 27.73617 | 32.29         | 1        |
| CTRL | 30.44        | 30.1           | 30.26952 | 30.96         | 1        |
| CTRL | 31.5         | 32.02          | 31.75894 | 29.56         | 1        |
| CORT | 30.73        | 32.95          | 31.82065 | 31.1          | 2.771459 |
| CORT | 29.43        | 30.49          | 29.95531 | 30.8          | 0.936475 |
| CORT | 29.99        | 30.45          | 30.21912 | 29.5          | 2.768539 |
| CORT | 29.16        | 30.79          | 29.96392 | 28.93         | 3.443602 |
| CORT | 27.9         | 29.36          | 28.62069 | 30.14         | 0.586699 |
| CORT | 26.98        | 27.58          | 27.27835 | 26.21         | 3.526777 |

**Table S10n: Gene expression (fold change) of UCP3 of Heart at week 4 for the CORT fed chicken and control**

| Trt  | <i>B-actin</i> | <i>GAPDH</i> | Ref. av. | <i>UCP3</i> | 2- $\Delta\Delta$ Ct |
|------|----------------|--------------|----------|-------------|----------------------|
|      | Av.Ct          | Av.Ct        |          | Av.Ct       |                      |
|      | RG             | RG           |          | Test        |                      |
| CTRL | 30.74          | 29.66        | 30.19517 | 30.56       | 1                    |
| CTRL | 29.5           | 29.02        | 29.25902 | 30.23       | 1                    |
| CTRL | 29.49          | 29.21        | 29.34967 | 29.41       | 1                    |
| CTRL | 35.86          | 34.19        | 35.01505 | 35.3        | 1                    |
| CTRL | 36.01          | 39.29        | 37.61426 | 35.27       | 1                    |
| CTRL | 28.91          | 27.8         | 28.34957 | 27.18       | 1                    |
| CTRL | 32.59          | 27.63        | 30.00769 | 32.44       | 1                    |
| CORT | 36.82          | 32.82        | 34.76251 | 34.75       | 1.07067              |
| CORT | 28.51          | 35.11        | 31.63836 | 28.38       | 10.15673             |
| CORT | 26.84          | 27.5         | 27.168   | 26.43       | 1.770302             |
| CORT | 28.36          | 26.18        | 27.24821 | 28.07       | 0.600488             |
| CORT | 27.55          | 33.3         | 30.28886 | 27.18       | 9.1569               |
| CORT | 32.64          | 33.87        | 33.24931 | 31.73       | 3.042617             |

**Table S10o: Gene expression (fold change) of COX6A1 of Heart at week 4 of CORT fed chicken and control**

| TRt  | <i>B-actin</i> | <i>GAPDH</i> | Ref. av. | <i>COX6A1</i> | 2- $\Delta\Delta$ Ct |
|------|----------------|--------------|----------|---------------|----------------------|
|      | Av.Ct          | Av.Ct        |          | Av.Ct         |                      |
|      | RG             | RG           |          | Test          |                      |
| CTRL | 30.74          | 29.66        | 30.19517 | 28.84         | 1                    |
| CTRL | 29.5           | 29.02        | 29.25902 | 35.13         | 1                    |
| CTRL | 29.49          | 29.21        | 29.34967 | 33.94         | 1                    |
| CTRL | 35.86          | 34.19        | 35.01505 | 34.51         | 1                    |
| CTRL | 36.01          | 39.29        | 37.61426 | 35.56         | 1                    |
| CTRL | 28.91          | 27.8         | 28.34957 | 27.88         | 1                    |
| CTRL | 32.59          | 27.63        | 30.00769 | 29.8          | 1                    |
| CORT | 33.98          | 34.78        | 34.37767 | 34.86         | 1.281357             |
| CORT | 36.82          | 32.82        | 34.76251 | 33.93         | 3.187697             |
| CORT | 26.84          | 27.5         | 27.168   | 31.17         | 0.111723             |
| CORT | 28.36          | 26.18        | 27.24821 | 27.61         | 1.393012             |
| CORT | 36.39          | 27.54        | 31.65724 | 38.05         | 0.021304             |

**Table S10p: Gene expression (fold change) of *UCP3* of Heart at week 6 of CORT fed chicken and control**

| TRt  | <i>GAPDH</i> | <i>B.actin</i> | Ref.av   | <i>UCP3</i> | 2- $\Delta\Delta$ Ct |
|------|--------------|----------------|----------|-------------|----------------------|
|      | Av.Ct        | Av.Ct          |          | Av.Ct       |                      |
|      | RG           | RG             |          | Test        |                      |
| CTRL | 26.13        | 28.19          | 27.14046 | 28.38       | 1                    |
| CTRL | 26.61        | 28.91          | 27.73617 | 29.39       | 1                    |
| CTRL | 30.44        | 30.1           | 30.26952 | 29.78       | 1                    |
| CTRL | 31.5         | 32.02          | 31.75894 | 30.45       | 1                    |
| CORT | 30.73        | 32.95          | 31.82065 | 30.75       | 2.532647             |
| CORT | 29.43        | 30.49          | 29.95531 | 31.04       | 0.568531             |
| CORT | 29.99        | 30.45          | 30.21912 | 31.06       | 0.673208             |
| CORT | 29.16        | 30.79          | 29.96392 | 30.06       | 1.128118             |
| CORT | 27.9         | 29.36          | 28.62069 | 29.08       | 0.877026             |
| CORT | 26.98        | 27.58          | 27.27835 | 30.15       | 0.16475              |

**Table S10q: Gene expression of *SAAL1* of hypothalamus at week 4 of CORT fed chicken and control**

| TRt  | <i>GAPDH</i> | <i>B-Actin</i> | Ref. av  | <i>SAAL1</i> | 2- $\Delta\Delta$ Ct |
|------|--------------|----------------|----------|--------------|----------------------|
|      | Av.Ct        | Av.Ct          |          | Av.Ct        |                      |
|      | RG           | RG             |          | Test         |                      |
| CTRL | 27.75        | 28.21          | 27.97905 | 26.89        | 1                    |
| CTRL | 27.56        | 28.07          | 27.81383 | 26.82        | 1                    |
| CTRL | 27.33        | 27.63          | 27.47959 | 26.42        | 1                    |
| CTRL | 27.29        | 28.26          | 27.77077 | 26.75        | 1                    |
| CTRL | 26.78        | 27.5           | 27.13761 | 26.45        | 1                    |
| CTRL | 26.25        | 26.97          | 26.60756 | 25.49        | 1                    |
| CTRL | 22.83        | 38.48          | 29.63947 | 27.68        | 1                    |
| CTRL | 26.41        | 35.03          | 30.41615 | 26.63        | 1                    |
| CTRL | 30.63        | 28.5           | 29.54581 | 26.84        | 1                    |
| CTRL | 26.75        | 28.82          | 27.76572 | 26.08        | 1                    |
| CORT | 27.12        | 28.2           | 27.65473 | 26.85        | 0.572254             |
| CORT | 26.38        | 27.52          | 26.94397 | 26.09        | 0.592124             |
| CORT | 26.3         | 27.48          | 26.88353 | 26.29        | 0.494323             |
| CORT | 26.94        | 26.74          | 26.83981 | 26.33        | 0.466456             |
| CORT | 27.4         | 28.16          | 27.7774  | 26.86        | 0.618738             |
| CORT | 26.77        | 28.62          | 27.67955 | 26.26        | 0.876331             |
| CORT | 26.02        | 27.82          | 26.90495 | 25.78        | 0.714473             |
| CORT | 28.18        | 28.15          | 28.165   | 27.53        | 0.508738             |

**Table S10r: Gene expression (fold change) of CRP of hypothalamus at week 4 of CORT fed chicken and control**

|      | <i>GAPDH</i> | <i>B-Actin</i> |          |       |          |
|------|--------------|----------------|----------|-------|----------|
|      | Av.Ct        | Av.Ct          | Ref.av   | Av.Ct | 2-ΔΔCt   |
|      | RG           | RG             |          | Test  |          |
| CTRL | 27.75        | 28.21          | 27.97905 | 25.77 | 1        |
| CTRL | 27.56        | 28.07          | 27.81383 | 25.3  | 1        |
| CTRL | 27.33        | 27.63          | 27.47959 | 24.6  | 1        |
| CTRL | 27.29        | 28.26          | 27.77077 | 24.35 | 1        |
| CTRL | 26.78        | 27.5           | 27.13761 | 23.61 | 1        |
| CTRL | 26.25        | 26.97          | 26.60756 | 23.35 | 1        |
| CTRL | 26.41        | 38.48          | 31.87878 | 29.96 | 1        |
| CTRL | 30.63        | 35.03          | 32.7562  | 32.65 | 1        |
| CTRL | 26.75        | 28.5           | 27.61114 | 30.06 | 1        |
| CORT | 29.18        | 34.39          | 31.67807 | 27.08 | 6.355789 |
| CORT | 27.12        | 28.2           | 27.65473 | 25.73 | 0.996353 |
| CORT | 26.38        | 27.52          | 26.94397 | 23.73 | 2.435084 |
| CORT | 26.3         | 27.48          | 26.88353 | 26.37 | 0.374627 |
| CORT | 27.4         | 26.74          | 27.06799 | 24.29 | 1.799989 |
| CORT | 26.77        | 28.16          | 27.45621 | 23.56 | 3.90739  |
| CORT | 26.02        | 28.62          | 27.28905 | 24.51 | 1.801318 |
| CORT | 28.18        | 27.82          | 27.99942 | 26.37 | 0.811927 |

**Table S10s: Gene expression (fold change) of SAAL1 of hypothalamus at week 6 of CORT fed chicken and control**

|      | <i>GAPDH</i> | <i>B-Actin</i> |          | <i>SAAL1</i> |                      |
|------|--------------|----------------|----------|--------------|----------------------|
|      | Av.Ct        | Av.Ct          | Ref.av   | Av.Ct        | 2- $\Delta\Delta$ Ct |
|      | HG           | HG             |          | Test         |                      |
| CTRL | 26.24        | 27.03          | 26.63207 | 25.81        | 1                    |
| CTRL | 26.63        | 26.91          | 26.76963 | 26.25        | 1                    |
| CTRL | 26.84        | 27.28          | 27.05911 | 26.84        | 1                    |
| CTRL | 26.97        | 26.83          | 26.89991 | 26.58        | 1                    |
| CTRL | 26.79        | 26.67          | 26.72993 | 27           | 1                    |
| CTRL | 26.51        | 27.09          | 26.79843 | 27.07        | 1                    |
| CTRL | 26.3         | 29.78          | 27.98596 | 29.82        | 1                    |
| CTRL | 32.11        | 28.21          | 30.0969  | 27.72        | 1                    |
| CTRL | 27.53        | 29.51          | 28.50281 | 29           | 1                    |
| CORT | 27.09        | 28.24          | 27.65902 | 27.14        | 1.291479             |
| CORT | 26.8         | 28.25          | 27.51545 | 26.57        | 1.735619             |
| CORT | 26.81        | 27.92          | 27.35937 | 26.38        | 1.776911             |
| CORT | 26.77        | 27.67          | 27.21628 | 26           | 2.094027             |
| CORT | 25.17        | 26.68          | 25.914   | 25.2         | 1.478366             |
| CORT | 27.09        | 27.68          | 27.38341 | 26.42        | 1.757362             |
| CORT | 27.04        | 27.26          | 27.14978 | 27.04        | 0.972505             |
| CORT | 26.57        | 27.06          | 26.81388 | 27.21        | 0.68486              |
| CORT | 27.67        | 27.64          | 27.655   | 28.89        | 0.382888             |
| CORT | 27.46        | 27.73          | 27.59467 | 27.9         | 0.729343             |

**Table S10t: Gene expression (fold change) of *CRP* of hypothalamus at week 6 of CORT fed chicken and control**

|      | <i>GAPDH</i> | <i>B-Actin</i> |          |       |          |
|------|--------------|----------------|----------|-------|----------|
|      | Av.Ct        | Av.Ct          | Ref.av   | Av.Ct | 2-ΔΔCt   |
|      | HG           | HG             |          | Test  |          |
| CTRL | 26.24        | 27.03          | 26.63207 | 26.83 | 1        |
| CTRL | 26.63        | 26.91          | 26.76963 | 26.43 | 1        |
| CTRL | 26.84        | 27.28          | 27.05911 | 25.89 | 1        |
| CTRL | 26.97        | 26.83          | 26.89991 | 25.1  | 1        |
| CTRL | 26.79        | 26.67          | 26.72993 | 25.62 | 1        |
| CTRL | 26.51        | 27.09          | 26.79843 | 26.11 | 1        |
| CTRL | 26.3         | 29.78          | 27.98596 | 26.6  | 1        |
| CTRL | 32.11        | 28.21          | 30.0969  | 29.49 | 1        |
| CTRL | 27.53        | 29.51          | 28.50281 | 28.36 | 1        |
| CORT | 27.09        | 28.24          | 27.65902 | 28.02 | 0.453453 |
| CORT | 26.81        | 28.25          | 27.52058 | 26.75 | 0.993494 |
| CORT | 26.77        | 27.92          | 27.33895 | 25.71 | 1.801194 |
| CORT | 25.17        | 27.67          | 26.39041 | 25.01 | 1.516151 |
| CORT | 27.09        | 26.68          | 26.88422 | 26.39 | 0.820297 |
| CORT | 27.04        | 27.68          | 27.35813 | 26.85 | 0.828244 |
| CORT | 26.57        | 27.26          | 26.91279 | 25.79 | 1.268206 |
| CORT | 27.67        | 27.06          | 27.3633  | 28.36 | 0.29185  |

**LIST OF ABBREVIATIONS**

|                |                                          |
|----------------|------------------------------------------|
| a*             | Meat redness                             |
| b*             | Meat yellowness                          |
| <i>β-Actin</i> | Beta actin                               |
| CORT           | Corticosterone                           |
| CTRL           | Control                                  |
| CL             | Cooking loss                             |
| <i>COX6A1</i>  | Cytochrome C oxidase 1                   |
| <i>CRP</i>     | C-reactive protein                       |
| DL             | Drip Loss                                |
| <i>GAPDH</i>   | Glyceraldehyde 3-phosphate dehydrogenase |
| L*             | Meat Lightness                           |
| qPCR           | Quantitative polymerase chain reaction   |
| <i>SAAL1</i>   | Serum amyloid alpha 1                    |
| Kg             | Kilogram                                 |
| Kb             | Kilobase                                 |
| μl             | Microlitre                               |
| μm             | Micromolar                               |



---

|             |                                              |
|-------------|----------------------------------------------|
| UCP3        | Uncoupling protein P                         |
| $\Delta$ Ct | Change in threshold cycle                    |
| Trt         | Treatment                                    |
| Jeju        | Jejunum                                      |
| Duod        | Duodenum                                     |
| Ht          | Height                                       |
| CD          | Crypt depth                                  |
| wt          | Weight                                       |
| FCR         | Feed conversion ratio                        |
| RFI         | Relative feed intake                         |
| Rwt         | Relative weight gain                         |
| RFCR        | Relative FCR                                 |
| TELO        | Telomere                                     |
| S           | Supplementary data                           |
| Mj/Kg       | Megajoule                                    |
| DM          | Dry matter                                   |
| EE          | Ether extract                                |
| ME          | Metabolizable energy                         |
| CP          | Crude protein                                |
| pH          | Degree of acidity and alkalinity             |
| Av.Ct       | Average threshold cycle                      |
| Ref. av.    | Reference genes average using geometry means |
